# Supplementary material for: Biosurfactant-Producing Bacillus velezensis PW192 as an Anti-Fungal Biocontrol Agent against Colletotrichum gloeosporioides and Colletotrichum musae
Source: MDPI journal article supplement (doi:10.3390/microorganisms10051017), 2022-05-12
Supplement: s1 [file s1]

# Supplementary

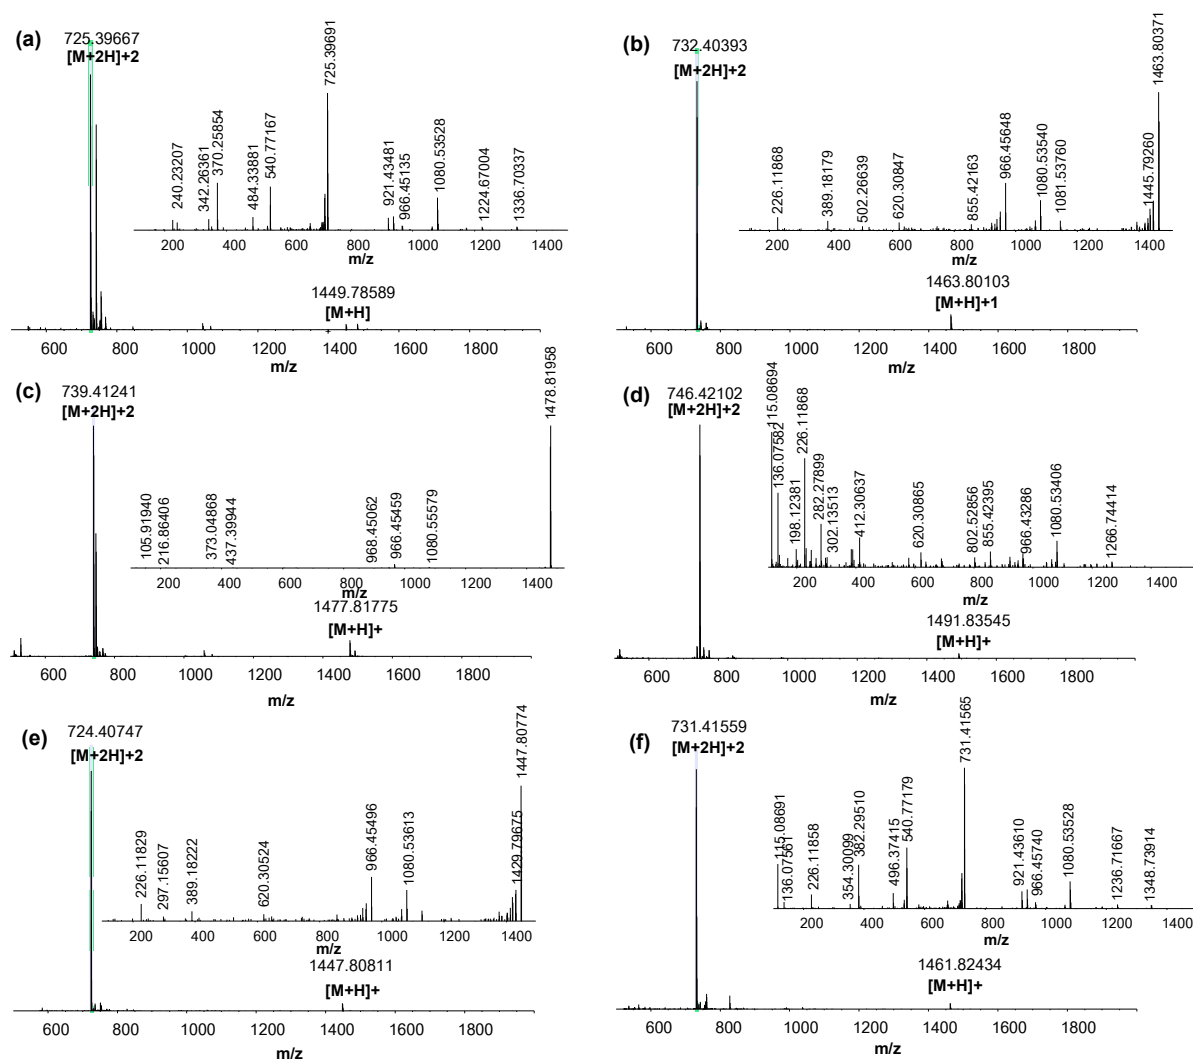

**Figure S1.** (a–f) The MS spectra showing doubly and singly charged species of molecular ions of fengycin A derivatives. The insets of (a–f) illustrate the MS/MS spectra of the molecular ions  $[M+2H]^{2+}$  as follows: 725.3967 (inset of (a)), 732.4039 (inset of (b)), 739.4124 (inset of (c)), 746.4210 (inset of (d)), 724.4075 (inset of (e)) and 731.4156 (inset of (f)) using the higher-collision dissociation (HCD) energy of 30 V. The characteristic  $[M+H]^+$ s of 1080.5 and 966.5 is corresponding to Glu-Orn-Tyr-Thr-Glu-Ala-Pro-Gln-Tyr-Ile and Orn-Tyr-Thr-Glu-Ala-Pro-Gln-Tyr-Ile, respectively.

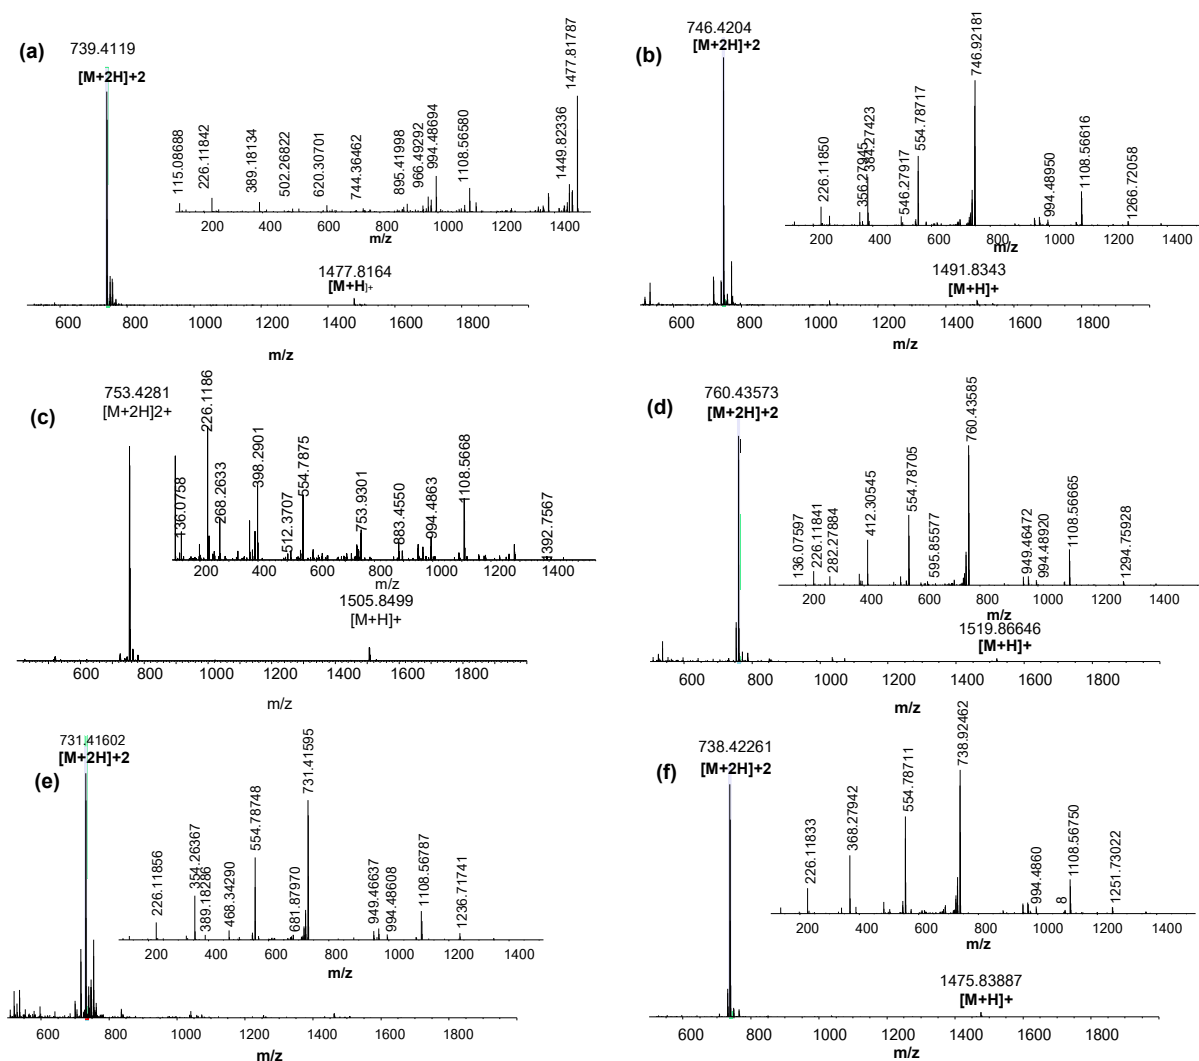

**Figure S2.** (a–f) The MS spectra showing doubly and singly charged species of molecular ions of fengycin B derivatives. The insets of (a–f) illustrate the MS/MS spectra of the molecular ions  $[M+2H]^{2+}$  as follows: 739.4119 (inset of (a)), 746.4204 (inset of (b)), 753.4281 (inset of (c)), 760.4357 (inset of (d)), 731.4160 (inset of (e)) and 738.4226 (inset of (f)) using the higher-collision dissociation (HCD) energy of 30 V. The characteristic  $[M+H]^+$ s of 1108.5 and 994.5 is corresponding to Glu-Orn-Tyr-Thr-Glu-Val-Pro-Gln-Tyr-Ile and Orn-Tyr-Thr-Glu-Val-Pro-Gln-Tyr-Ile, respectively.
